# Supplementary material for: Somatostatin contributes to long-term potentiation at excitatory synapses onto hippocampal somatostatinergic interneurons
Source: PubMed Central journal article supplement (PMC8385910; doi:10.1186/s13041-021-00830-6), 2021-08-24
Supplement: 13041_2021_830_MOESM1_ESM.pdf [file 13041_2021_830_MOESM1_ESM.pdf]

| Figure | Panel                                 | Group size                                                         | Test                                          | Statistic                                                | P values                | Statistic 2                       | P values 2                                                                                                |
|--------|---------------------------------------|--------------------------------------------------------------------|-----------------------------------------------|----------------------------------------------------------|-------------------------|-----------------------------------|-----------------------------------------------------------------------------------------------------------|
| 1      | e                                     | Veh n = 9<br>SST <sub>14</sub> n = 10                              | 2-way mixed ANOVA<br>(Condition x time)       | Interaction:<br>F(2,682; 45, 600) = 5.168                | p = 0.005               | Dunnett's multiple<br>comparisons | 25-30min p = 0.025<br>30-35min p = 0.023                                                                  |
|        |                                       |                                                                    | rmANOVA veh<br>rmANOVA SST <sub>14</sub>      | F(3.118 ; 24.947) = 0.255<br>F(2.247 ; 20.222) = 7.046   | p = 0.864<br>p = 0.004  |                                   |                                                                                                           |
|        |                                       | Cycl + SST n = 8<br>SST <sub>14</sub> n = 10                       | 2-way mixed ANOVA<br>(Condition x time)       | Interaction:<br>F(2.793; 44.692) = 10.638                | p < 0.0001              |                                   |                                                                                                           |
|        |                                       |                                                                    | rmANOVA cyst+SST                              | F(3.151; 22.060) = 1.075                                 | p = 0.382               |                                   |                                                                                                           |
|        | f                                     | Veh n = 9<br>SST <sub>14</sub> n = 10                              | Univariate analysis of<br>variance (30-35min) | F(1, 17) = 8.141                                         | p = 0.010               |                                   |                                                                                                           |
|        |                                       |                                                                    | Cycl + SST n = 8<br>SST <sub>14</sub> n = 10  | Univariate analysis of<br>variance (30-35min)            | F(1, 16) = 12.984       | p = 0.002                         |                                                                                                           |
|        |                                       | DMSO n = 7<br>Cycl n = 8<br>Cycl + SST n = 8                       | 2-way mixed ANOVA<br>(Condition x time)       | F(8.756; 87.563) = 0.814                                 | p = 0.0602              |                                   |                                                                                                           |
| g      | Veh n = 9<br>SST <sub>14</sub> n = 10 | Main effect time<br>Main effect group                              | F(1,36; 23, 18) = 0.310<br>F(1, 17) = 0.672   | p = 0.653<br>p = 0.424                                   |                         |                                   |                                                                                                           |
|        |                                       | 2-way mixed ANOVA<br>(Condition x time)<br><i>Input resistance</i> | F(1,36; 23, 18) = 0.479                       | p = 0.554                                                |                         |                                   |                                                                                                           |
| 2      | d                                     | DMSO n = 12<br>Cycl. n = 10                                        | 2-way mixed ANOVA<br>(condition x time)       | Interaction<br>F(3.027 ; 60.546) = 5.849                 | p = 0,001               | Dunnett's multiple<br>comparisons | 5-10min p = 0.040<br>10-15min p = 0.009<br>15-20min p = 0.006<br>20-25min p = 0.006<br>25-30min p = 0.002 |
|        |                                       |                                                                    | rmANOVA Cycl<br>rmANOVA DMSO                  | F(3.008 ; 33.091) = 2.062<br>F(9, 63) = 7,636 p < 0.0001 | p = 0.124<br>p < 0.0001 |                                   |                                                                                                           |
|        | e                                     | DMSO n = 12<br>Cycl. n = 10                                        | Univariate analysis of<br>variance (25-30min) | F(1,20) = 19.330                                         | p = 0.0003              |                                   |                                                                                                           |
| 3      | a                                     | Cyst. IP n = 3 mice<br>Veh n = 3 mice                              | Unpaired t –test                              | t(4) = 4.280                                             | p = 0.049               |                                   |                                                                                                           |

|          |                                                                   |                                            |                             |              |                                   |                                                                 |
|----------|-------------------------------------------------------------------|--------------------------------------------|-----------------------------|--------------|-----------------------------------|-----------------------------------------------------------------|
| <b>b</b> | Cyst. IP n = 11<br>Veh n = 11                                     | 2-way mixed ANOVA<br>(condition x time)    | $F(3.491; 69.829) = 12.118$ | $p < 0,0001$ |                                   |                                                                 |
|          |                                                                   | rmANOVA Cyst IP                            | $F(2.946; 29.458) = 7.859$  | $p = 0,001$  | Dunnett's multiple comparisons    | 15-20min p = 0.04<br>20-25min p = 0.03<br>25-30min p = 0.005    |
|          |                                                                   | rmANOVA Veh                                | $F(3.040; 30.401) = 6,013$  | $p = 0,002$  | Dunnett's multiple comparisons    | 15-20min p = 0.028<br>20-25min p = 0.016<br>25-30min p = 0.0007 |
| <b>c</b> | Cyst. IP n = 11<br>Veh n = 11                                     | Univariate analysis of variance (25-30min) | $F(1,20) = 61.005$          | $p < 0,0001$ |                                   |                                                                 |
| <b>d</b> | Cyst acute n = 4 mice<br>Veh n = 4 mice                           | Unpaired t-test                            | $t(18) = 2.367$             | $p = 0.029$  |                                   |                                                                 |
| <b>e</b> | Cyst acute n = 9<br>Veh = 12                                      | 2-way mixed ANOVA<br>(condition x time)    | $F(3.272; 62.165) = 4.042$  | $p = 0.009$  |                                   |                                                                 |
|          |                                                                   | rmANOVA Cyst acute                         | $F(3.201; 35.215) = 2.242$  | $p = 0,097$  |                                   |                                                                 |
|          |                                                                   | rmANOVA Veh                                | $F(6, 48) = 2.504$          | $p = 0,035$  | Dunnett's multiple comparisons    | 10-15min p = 0.027<br>15-20min p = 0.008<br>25-30min p = 0.027  |
| <b>f</b> | Cyst acute n = 9<br>Veh = 12                                      | Univariate analysis of variance (25-30min) | $F(1,19) = 22.789$          | $p = 0.0001$ |                                   |                                                                 |
| <b>4</b> | SST <sub>14</sub> n = 7<br>SST <sub>14</sub> + n = 8<br>DL-APV    | 2-way mixed ANOVA<br>(condition x time)    | $F(7, 91) = 0.567$          | $p = 0.781$  |                                   |                                                                 |
|          |                                                                   | Main effect of time                        | $F(7, 91) = 8.214$          | $p < 0.0001$ | Bonferroni's multiple comparisons | 30-35min p = 0.016                                              |
|          |                                                                   | Main effect of group                       | $F(1, 13) = 0.066$          | $p = 0.865$  |                                   |                                                                 |
| <b>c</b> | SST <sub>14</sub> n = 9<br>SST <sub>14</sub> + n = 10<br>LY367385 | 2-way mixed ANOVA<br>(condition x time)    | $F(3.191; 54.251) = 0.546$  | $p = 0.664$  |                                   |                                                                 |
|          |                                                                   | Main effect of time                        | $F(3.191; 54.251) = 11.313$ | $p < 0.0001$ | Bonferroni's multiple comparisons | 25-30min p = 0.004<br>30-35min p = 0.005                        |
|          |                                                                   | Main effect of group                       | $F(1,17) = 0.030$           | $p = 0.863$  |                                   |                                                                 |
| <b>e</b> | SST <sub>14</sub> n = 16                                          | Paired t-Test                              | $t(14) = 0.642$             | $p = 0.531$  |                                   |                                                                 |
| <b>5</b> | Veh n = 9                                                         | 2-way mixed ANOVA                          | $F(2.861; 48.637) = 1.390$  | $p = 0.258$  |                                   |                                                                 |

|   |   |                                                                                               |                                                                                                          |                           |            |                                   |                    |
|---|---|-----------------------------------------------------------------------------------------------|----------------------------------------------------------------------------------------------------------|---------------------------|------------|-----------------------------------|--------------------|
|   |   | SST <sub>14</sub> n = 10                                                                      | (condition x time)                                                                                       |                           |            |                                   |                    |
|   |   |                                                                                               | Main effect of time                                                                                      | F(2.861; 48.637) = 5.176  | p = 0.004  | Bonferroni's multiple comparisons | 25-30min p = 0.029 |
|   |   |                                                                                               | Main effect of group                                                                                     | F(1, 17) = 2.153          | p = 0.161  |                                   |                    |
| 6 | d | Veh n = 10<br>SST <sub>14</sub> n = 9                                                         | 2-way mixed ANOVA (condition x time)<br><i>PV-INs</i>                                                    | F(2.557; 43.471) = 1.969  | p = 0.141  |                                   |                    |
|   |   |                                                                                               | Main effect of group                                                                                     | F(1, 17) = 0.510          | p = 0.485  | Bonferroni's multiple comparisons | 10-15min p = 0.029 |
|   |   |                                                                                               | Main effect of time                                                                                      | F(2.557; 43.471) = 9.503  | p = 0.0001 |                                   | 15-20min p = 0.027 |
|   |   |                                                                                               |                                                                                                          |                           |            |                                   | 20-25min p = 0.042 |
|   |   |                                                                                               |                                                                                                          |                           |            |                                   | 25-30min p = 0.021 |
|   |   |                                                                                               |                                                                                                          |                           |            |                                   | 30-35min p = 0.010 |
|   | g | Veh n = 8<br>SST <sub>14</sub> n = 8                                                          | 2-way mixed ANOVA (condition x time)<br><i>PCs</i>                                                       | F(7, 98) = 0.905          | p = 0.506  |                                   |                    |
|   |   |                                                                                               | Main effect of time                                                                                      | F(7, 98) = 1.017          | p = 0.424  |                                   |                    |
|   |   |                                                                                               | Main effect of group                                                                                     | F(1, 14) = 0.945          | p = 0.348  |                                   |                    |
| 7 | c | Veh n = 11<br>SST <sub>14</sub> n = 10                                                        | 2-way mixed ANOVA (condition x time)                                                                     | F(3.058; 58.106) = 0.829  | p = 0.485  |                                   |                    |
|   |   |                                                                                               | Main effect of time                                                                                      | F(3.058; 58.106) = 1.305  | p = 0.281  |                                   |                    |
|   |   |                                                                                               | Main effect of group                                                                                     | F(1,19) = 3.332           | p = 0.084  |                                   |                    |
|   | f | DMSO n = 8<br>Cycl. n = 10                                                                    | 2-way mixed ANOVA (condition x time)                                                                     | F(3.838; 61.402) = 1.021  | p = 0.402  |                                   |                    |
|   |   |                                                                                               | Main effect of time                                                                                      | F(3.838; 61.402) = 11.851 | p < 0.0001 | Bonferroni's multiple comparisons | 20-25min p = 0.019 |
|   |   |                                                                                               | Main effect of group                                                                                     | F(1, 16) = 1.247          | p = 0.281  |                                   | 25-30min p = 0.017 |
| 8 | d | SST <sub>14</sub> n = 10<br>SST <sub>14</sub> + CA3 cut n = 11<br>SST <sub>14</sub> + CA3 cut | <u>SST<sub>14</sub> vs SST<sub>14</sub> + CA3 cut + Gabazine</u><br>2-way mixed ANOVA (condition x time) | F(2.729; 51.845) = 7.071  | p = 0.001  |                                   |                    |

+ Gabazine n = 11

|                                                                                                                     |                           |            |                                |                    |
|---------------------------------------------------------------------------------------------------------------------|---------------------------|------------|--------------------------------|--------------------|
| rmANOVA SST <sub>14</sub>                                                                                           | F(2.425 ; 21.828) = 8.641 | p = 0.001  | Dunnett's multiple comparisons | 0-5min p = 0.008   |
| rmANOVA SST <sub>14</sub> , ∅<br>CA3+ Gabazine                                                                      | F(2.529 ; 25.293) = 0.974 | p = 0.498  |                                | 5-10min p = 0.023  |
|                                                                                                                     |                           |            |                                | 10-15min p = 0.033 |
|                                                                                                                     |                           |            |                                | 15-20min p = 0.033 |
|                                                                                                                     |                           |            |                                | 20-25min p = 0.009 |
|                                                                                                                     |                           |            |                                | 25-30min p = 0.007 |
|                                                                                                                     |                           |            |                                | 30-35min p = 0.009 |
| <b><u>SST<sub>14</sub> + CA3 cut vs</u></b><br><b><u>SST<sub>14</sub> + CA3 cut +</u></b><br><b><u>Gabazine</u></b> | F(3.395; 67.906) = 6.371  | p = 0.0004 |                                |                    |
| 2-way mixed ANOVA<br>(condition x time)                                                                             |                           |            |                                |                    |
| rmANOVA SST <sub>14</sub> + cut<br>CA3                                                                              | F(3.280; 32.803) = 9.814  | p < 0.0001 | Dunnett's multiple comparisons | 10-15min p = 0.023 |
|                                                                                                                     |                           |            |                                | 15-20min p = 0.046 |
|                                                                                                                     |                           |            |                                | 20-25min p = 0.027 |
|                                                                                                                     |                           |            |                                | 25-30min p = 0.003 |
|                                                                                                                     |                           |            |                                | 30-35min p = 0.004 |

|          |                                                                                   |                                               |                   |           |
|----------|-----------------------------------------------------------------------------------|-----------------------------------------------|-------------------|-----------|
| <b>e</b> | SST <sub>14</sub> n = 10<br>SST <sub>14</sub> , ∅ CA3+<br>Gabazine n = 11         | Univariate analysis of<br>variance (30-35min) | F(1, 19) = 16.828 | p = 0.001 |
|          | SST <sub>14</sub> , ∅ CA3 n = 11<br>SST <sub>14</sub> , ∅ CA3+<br>Gabazine n = 11 | Univariate analysis of<br>variance (30-35min) | F(1,22) = 16.133  | p = 0.001 |
